# Supplementary material for: Trends and Characteristics of Potentially Preventable Emergency Department Visits Among Patients With Cancer in the US
Source: PubMed Central journal article supplement (PMC9857289; doi:10.1001/jamanetworkopen.2022.50423), 2023-01-19
Supplement: jamanetwopen-e2250423-s001.pdf [file jamanetwopen-e2250423-s001.pdf]

## Supplemental Online Content

Alishahi Tabriz A, Turner K, Hong YR, Gheytsvand S, Powers BD, Elston Lafata J. Trends and characteristics of potentially preventable emergency department visits among patients with cancer in the US. *JAMA Netw Open*. 2023;6(1):e2250423.  
doi:10.1001/jamanetworkopen.2022.50423

**eTable.** All Variables Included in the Study

This supplemental material has been provided by the authors to give readers additional information about their work.

**eTable.** All Variables Included in the Study

| Name                                                                                      | Description                                                                                                                                                                                                               |
|-------------------------------------------------------------------------------------------|---------------------------------------------------------------------------------------------------------------------------------------------------------------------------------------------------------------------------|
| <b>Outcome variable</b>                                                                   |                                                                                                                                                                                                                           |
| Potentially preventable ED visit (based on CMS-OP35) <sup>1</sup>                         | Any ED visit due to one of these eight conditions will be considered as potentially avoidable; 1- Anemia, 2- Nausea, 3- Dehydration, 4- Neutropenia, 5- Diarrhea, 6- Pain, 7- Fever, 8- Emesis, 9- Sepsis, 10- Pneumonia. |
| <b>Main Independent variable</b>                                                          |                                                                                                                                                                                                                           |
| If patient already diagnosed with cancer                                                  | Yes, No, Missing                                                                                                                                                                                                          |
| <b>Patient level variables (control variables)</b>                                        |                                                                                                                                                                                                                           |
| Patient age                                                                               | 18-64 (Adults), ≥ 65 (Seniors), Missing                                                                                                                                                                                   |
| Patient sex                                                                               | Male, Female, Missing                                                                                                                                                                                                     |
| Patient race and ethnicity (Self-reported)                                                | White non-Hispanic, Black non-Hispanic, Hispanic, Other                                                                                                                                                                   |
| Patient residence                                                                         | Private residence, Nursing home, Other residence, Missing                                                                                                                                                                 |
| Patient primary payment type                                                              | Private insurance, Medicare, Medicaid, Uninsured/self pay, Missing                                                                                                                                                        |
| Patient triage acuity (the immediacy by which a patient needed to be seen by a physician) | Immediate (15 minutes), Emergent (15–60 minutes), Urgent (>1–2 hours), Semi-urgent (>2–24 hours), Non-urgent (more than 24 hours), No-triage, Missing                                                                     |
| Total number of chronic conditions                                                        | 0, 1, 2, 3, more than 3                                                                                                                                                                                                   |
| Patient disposition                                                                       | Admitted to hospital, discharged, Missing                                                                                                                                                                                 |
| <b>Hospital level factors (control variables)</b>                                         |                                                                                                                                                                                                                           |
| Region                                                                                    | Northeast, Midwest, South, West, Missing                                                                                                                                                                                  |
| Urbanity                                                                                  | Metropolitan statistical area (MSA), Non-MSA, Missing                                                                                                                                                                     |
| <b>Temporal factor (control variables)</b>                                                |                                                                                                                                                                                                                           |
| Patient arrival time                                                                      | Midnight-8am, 8am-4pm, 4pm-midnight, Missing                                                                                                                                                                              |
| Day of week                                                                               | Weekend, Weekday                                                                                                                                                                                                          |
| Month of the year                                                                         | January, February, March, April, May, June, July, August, September, October, November, and December.                                                                                                                     |

1. Services C for M& M. Admissions and Emergency Department Visits for Patients Receiving Outpatient Chemotherapy Measure Technical Report.; 2018.
