# Supplementary material for: Trends and Characteristics of Potentially Preventable Emergency Department Visits Among Patients With Cancer in the US
Source: PubMed Central journal article supplement (PMC9857289; doi:10.1001/jamanetworkopen.2022.50423), 2023-01-19
Supplement: jamanetwopen-e2250423-s002.pdf [file jamanetwopen-e2250423-s002.pdf]

## Data Sharing Statement

Alishahi Tabriz. Trends and Characteristics of Potentially Preventable Emergency Department Visits Among Patients With Cancer in the US. *JAMA Netw Open*. Published January 19, 2023. doi:10.1001/jamanetworkopen.2022.50423

### Data

**Data available:** Yes

**Data types:** Deidentified participant data

**How to access data:** [https://www.cdc.gov/nchs/ahcd/datasets\\_documentation\\_related.htm](https://www.cdc.gov/nchs/ahcd/datasets_documentation_related.htm)

**When available:** With publication

### Supporting Documents

**Document types:** None

### Additional Information

**Who can access the data:** Public.

**Types of analyses:** For any purpose.

**Mechanisms of data availability:** Without investigator support
